# Supplementary material for: Neutrophil Extracellular Vesicles and Airway Smooth Muscle Proliferation in the Natural Model of Severe Asthma in Horses
Source: MDPI journal article supplement (doi:10.3390/cells11213347), 2022-10-24
Supplement: s1 [file s1]

# **Supplement to: Neutrophil extracellular vesicles and airway smooth muscle proliferation in the natural model of severe asthma in horses**

Sophie Mainguy-Seers, Francis Beaudry, Christopher Fernandez-Prada, James G. Martin and Jean-Pierre Lavoie

## **Supplementary methods**

### *Experimental procedures*

#### **Animals**

The neutrophil EVs from eight horses with severe asthma were compared between remission and exacerbation of the disease. No data were available for power analysis, but eight horses were considered sufficient as previous studies demonstrated differences in peripheral neutrophil biology after an antigenic challenge by using six horses with severe asthma [1,2]. All procedures on animals were performed at a research farm, where they are housed all year round. Horses were conditioned to stand in a stock and to wear a facemask for lung function measurements. The horses were monitored daily, and humane endpoints included reduced appetite, abnormal fecal output, hyperthermia, colic, respiratory distress, or any other medical conditions that could have interfered with the study. No adverse events occurred during the experiment and clinical remission was re-obtained at the end of the study by dietary and environmental modifications.

#### **Endoscopic bronchoalveolar lavage**

With endoscopic guidance, two boluses of 250 mL of warm sterile isotonic saline were sequentially instilled into a main bronchus and aspirated via a suction pump. The samples were kept on ice until processing within 60 minutes. A modified Wright–Giemsa solution (Diff-Quik, Fisher Scientific, Waltham, Massachusetts, USA) was used to stain cytocentrifuged preparations of BALF. Differential cell counts were performed blindly from 400 leukocytes. In horses, BALF differential cell counts are preferred to the total counts as the BALF volume recovered depends on the degree of airway obstruction [3].

### *Extracellular vesicles characterization*

## Nanoparticle tracking analysis

The ZetaView device allows the evaluation of the particle size and quantification by tracking and videorecording the movement of individual EVs by using Brownian motion. The instrument was used as previously described with minor modifications [4]. Briefly, the device evaluated 11 different positions throughout the cell for each sample, with two readings at each position. The device software provided the EVs concentration and size (mean, median, and 10th and 90th percentile diameter) of the sample after automated removal of outlier positions. The pre-acquisition parameters were set to a sensitivity of 79, a shutter speed of 96 and a frame rate of 30 frames per second. Post-acquisition parameters were set to a maximum size of 1000 pixels, a minimum size of 10 pixels and a minimum brightness of 25.

## Sample preparation for proteomic analysis: protein extraction and digestion

Protein digestion and mass spectrometry experiments were performed by the Proteomics platform of the CHU de Québec Research Center, Québec, Canada. Solubilization of membranes was performed with the addition of sodium deoxycholate (DOC; final concentration of 1%) and ultrasonication on a Bioruptor (high intensity, 15 cycles of 30s on/off, Diagenode). Precipitation of proteins was carried out by adding five volumes of cold acetone (-20°C) for overnight incubation. After a 15-minute centrifugation at 10,000× *g*, proteins from the dry pellet were resuspended in 50 mM ammonium bicarbonate and 1% DOC and quantified with a Bradford assay (580 nm, Biorad). Protein denaturation prior to digestion was done by heating at 95°C for 5 min, cysteine disulfide bond reduction with dithiotreitol (0.2 mM at 37°C for 30 min) and cysteine alkylation with iodoacetamide (0.8 mM at 37°C for 30 min). Protein digestion was obtained by overnight incubation at 37°C with trypsin (1:50 protease:protein ratio, sequencing grade, Promega, Madison, WI). A solution of acetonitrile 3 % (ACN) trifluoric acid 1 % (TFA) and acetic acid 0.5% was used to stop the digestion. Tryptic peptides were desalted on C18 StageTips (Empore), vacuum dried and stored at -20°C prior to mass spectrometry analysis.

## Mass spectrometry

Samples were resuspended in 2% ACN;0.05% TFA in water and their concentration adjusted with 205 nm absorbance readings (Nanodrop, Thermo Fischer) for the injection of 1 µg of samples on the liquid chromatography system. Samples were analyzed by nanoLC/MSMS using a Dionex UltiMate 3000 nanoRSLC chromatography system (Thermo Fisher Scientific) coupled to an Orbitrap Fusion mass spectrometer (Thermo Fisher Scientific, San Jose, CA, USA) equipped with a nanoelectrospray ion source. Peptides were trapped at 20 µL/min in loading solvent (2% ACN, 0.05% TFA) on a 5 mm x 300 µm C18

pepmap cartridge (Thermo Fisher Scientific) for 5 minutes. Then, the pre-column was switched online with a separation column of 50 cm x 75  $\mu$ m internal diameter (Pepmap Acclaim column, ThermoFisher) and the peptides were eluted with a linear gradient from 5-40% solvent B (A: 0.1% formic acid, B: 80% acetonitrile, 0.1% formic acid) in 90 minutes, at 300 nL/min. Mass spectra were acquired using a data-dependent acquisition mode using Thermo XCalibur software (v4.1.50). Full scan mass spectra (m/z 350 to m/z 1800) were acquired in the Orbitrap using an AGC target of  $4 \times 10^5$ , a maximum injection time of 50 ms with a resolution of 120 000 (FWHM). Lock mass on the m/z 445.12003 siloxane ion was used for internal calibration. Each MS scan was followed by acquisition of fragmentation MS<sup>2</sup> spectra of the most intense ions for a total cycle time of 3 seconds (top speed mode). The selected ions were isolated using the quadrupole analyzer width of 1.6 Da and fragmented by Higher energy Collision-induced Dissociation (HCD) with 35% of collision energy. The resulting fragments were detected by the linear ion trap in rapid scan rate with an AGC target of  $1 \times 10^4$  and a maximum injection time of 50 ms. Dynamic exclusion of previously fragmented peptides was set for a period of 30 sec and a tolerance of 10 ppm.

#### Protein identification and data analysis

Mass spectra were searched against the Uniprot *Equus caballus* database (UniProt Reference Proteome – Proteome ID UP000002281– 44484 entries – 2021.05) using the search engine Andromeda integrated into the MaxQuant software (version 2.0.2.0) assuming the digestion enzyme trypsin. Cysteine carbamidomethylation was set as fixed modification and protein N-terminal acetylation and methionine oxidation were set as variable modifications. For protein validation, a false discovery rate (FDR) of 1% was allowed at peptide and protein level based on a target/decoy search. Label-free quantification (LFQ) was done with MaxQuant using a minimum of two unique peptides.

Text files generated by MaxQuant were analyzed using the R software (version 3.6.1). Only regular intensities from the proteinGroups.txt file were considered for data processing. Decoy proteins and potential contaminants were excluded from the analysis. The determination of a normalization factor was calculated for each sample by dividing their median intensity by the median of all the median intensities. For each sample, a noise value corresponding to the 0.01 percentile of all intensities of said sample was calculated and was imputed when an intensity value was missing from a sample. Only proteins identified with at least two razor unique peptides were considered as quantified proteins and kept in the analysis. The average intensity values from each experimental condition were calculated for each protein. Proteins with a  $\geq 2$ -fold difference between the different conditions were analyzed with repeated two-Way ANOVA (with the disease status and the cell treatment with or without LPS as the independent variables) and were

considered significantly regulated with a  $p < 0.05$ . Data were not analyzed when a protein was not quantified in a sample from more than one condition. The human orthologs of differentially regulated proteins were searched with the Uniprot Database; an ortholog protein could not be found for 14 equine proteins that were not used in the gene ontology analysis.

Gene ontology was evaluated with Metascape using the GO Biological processes and Reactome Databases. Briefly, the Metascape online platform [5] identify gene ontology terms significantly enriched within a provided list of proteins. Statistical analysis includes corrections with the Benjamini-Hochberg tests for multiple comparisons. The software Cytoscape [6] (version 3.9.1) with the ClueGo [7] (version 2.5.9) and Cluepedia[8] (version 11.0\_9606) plugins was used to visualize protein-protein interactions networks using preselected functions (gene ontology and Reactome pathways identified by Metascape), automatic parameters, yFiles Organic Layouts and the option connecting parent nodes up to the root node with Cluepedia.

#### *Airway smooth muscle isolation and characterization*

##### Cell culture

The endobronchial biopsies collected from each horse were kept in transport medium at 4 °C until processing within 60 minutes. Enzymatic digestion was performed as previously described [9]. Briefly, the biopsies were immersed for three hours in a digestion medium (Dulbecco's Modified Eagle Medium (DMEM)/F12 nutrient mix (Thermofisher, Waltham, MA) with 0.125 U/mL Collagenase H (Roche Diagnostics, Indianapolis, USA), 1 mg/mL Trypsin inhibitor (Sigma Aldrich, St. Louis, MO), 1 U/mL elastase (Worthington Biochemical, Lakewood, NJ), 1% Penicillin-Streptomycin (Wisent Inc., Saint-Jean-Baptiste, QC) and 0.1% Fungizone (Fisher Scientific, Hampton, NH). Then, the digested cells were seeded (50 000 cells/cm<sup>3</sup>) into ventilated cell culture flasks with DMEM/F12 (3:1) medium (Life Technologies), supplemented with adenine 2.4 mg/L, 10% fetal bovine serum (FBS), 1% penicillin-streptomycin and 0.1% fungizone. The medium was changed every 24 h for the first 3 days and then every 48 h.

##### Flow cytometry

The purity of each ASM cell culture at the end of P4 was assessed by flow cytometry using specific contractile proteins (anti- $\alpha$ -SMA and anti-desmin) as previously described [9]. Briefly, ASM cells were counted, washed in PBS1X twice, and fixed for 20 min with 4% paraformaldehyde and then washed three

times in PBS 1X and kept at 4 °C for no longer than a month prior to analysis. After non-specific blocking with 5% normal horse serum and permeabilization with Cytotfix-cytoperm, ASM cells ( $10^6$ ) were stained for anti- $\alpha$ -SMA (mouse IgG2a, Sigma Aldrich, St. Louis, MO, 1:250) and anti-desmin (rabbit polyclonal IgG, Abcam, Cambridge, UK, 1:200) antibodies for one hour. Then, cells were incubated in the dark for 40 min with fluorescent dye-conjugated anti-IgG antibodies. Isotype-matched control antibodies (mouse IgG2a and rabbit serum) were used as negative controls. Flow cytometry acquisition of 10,000 events was performed using CellQuest Pro software on a FACSCalibur instrument (BD Bioscience). Signals greater than those of the isotype controls were considered positive, and the mean percentage of positive cells were evaluated.

## Supplementary Figures

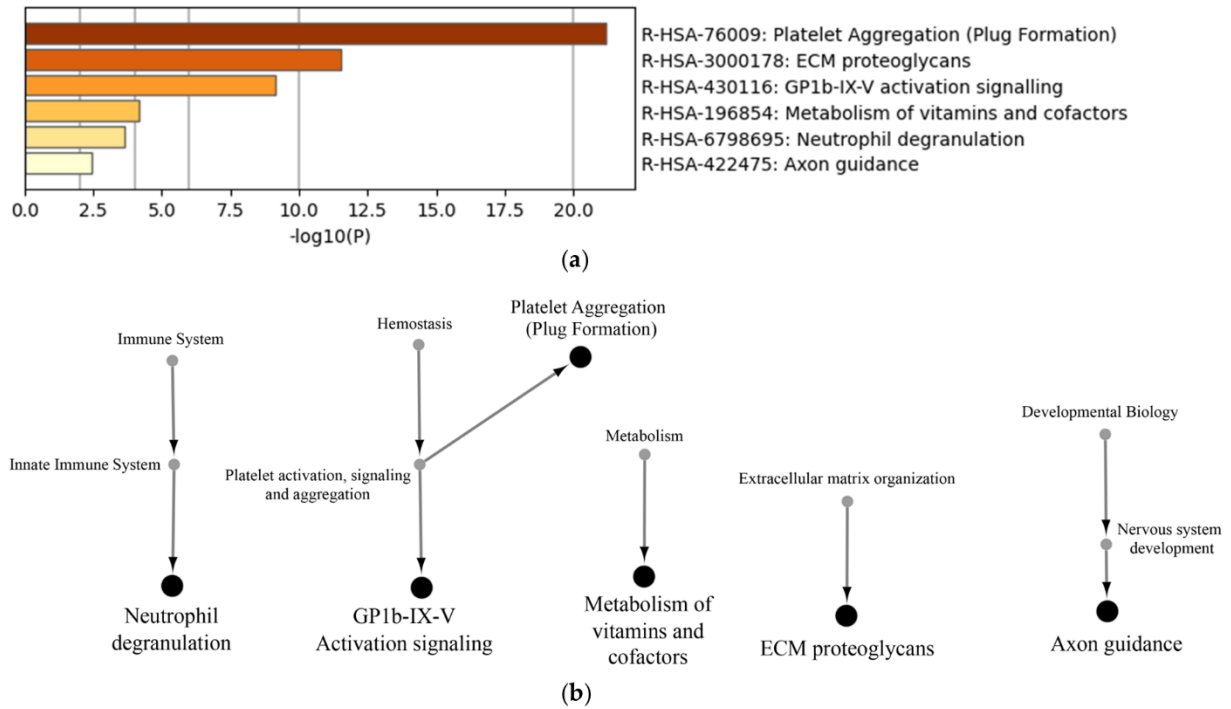

**Supplementary Figure S1.** Reactome enrichment analysis of proteins downregulated by LPS in neutrophil-derived EVs. Enrichment clusters identified by Metascape **(a)** and functional analysis of enriched GO terms from the parent node to the root node illustrated with ClueGo and Cluepedia in Cytoscape **(b)**.

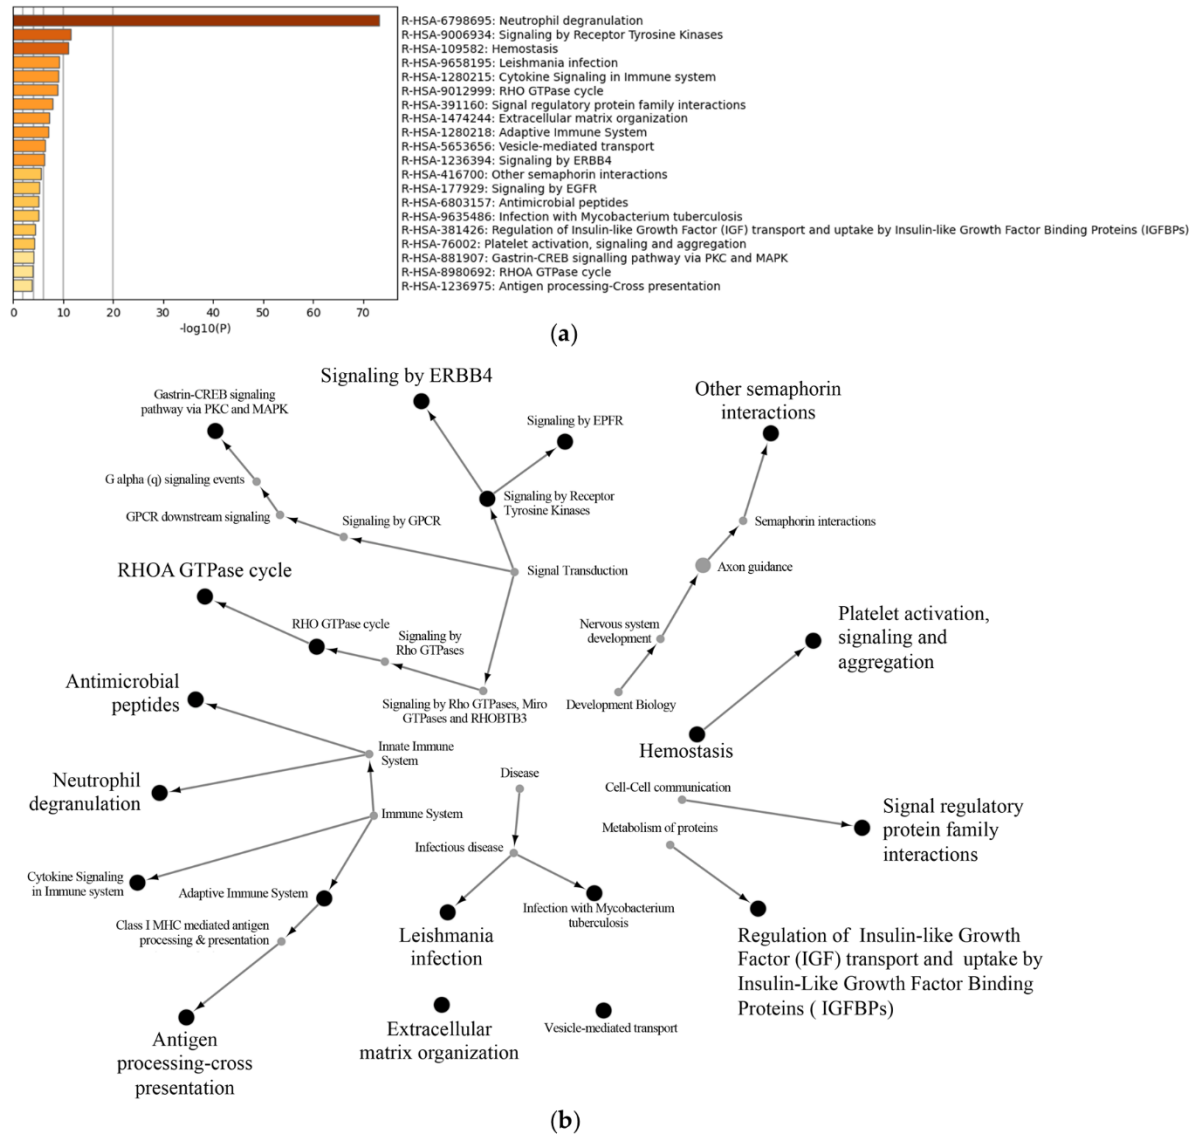

**Supplementary Figure S2.** Reactome enrichment analysis of proteins upregulated by LPS in neutrophil-derived EVs. Enrichment clusters identified by Metascape **(a)** and functional analysis of enriched GO terms from the parent node to the root node illustrated with ClueGo and Cluepedia in Cytoscape **(b)**.

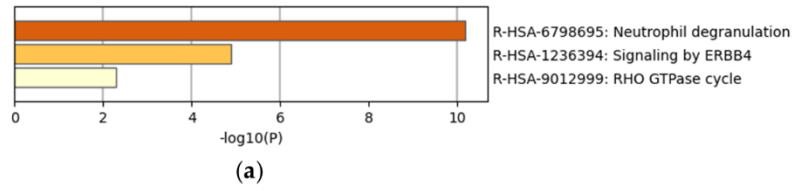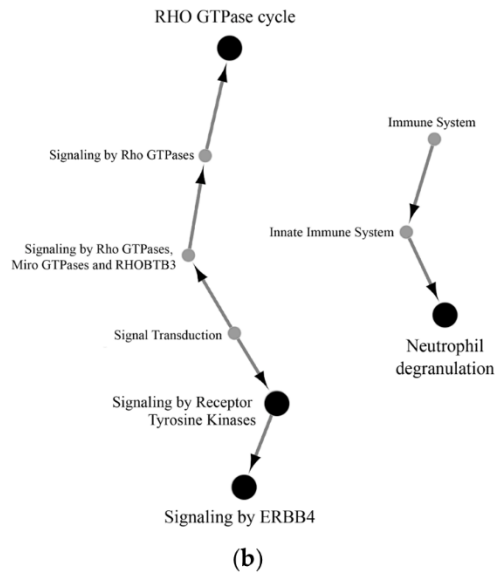

**Supplementary figure S3.** Reactome enrichment analysis of proteins upregulated by LPS in neutrophil-derived EVs only during asthmatic exacerbation. Enrichment clusters identified by Metascape (a) and functional analysis of enriched GO terms from the parent node to the root node illustrated with ClueGo and Cluepedia in Cytoscape (b).



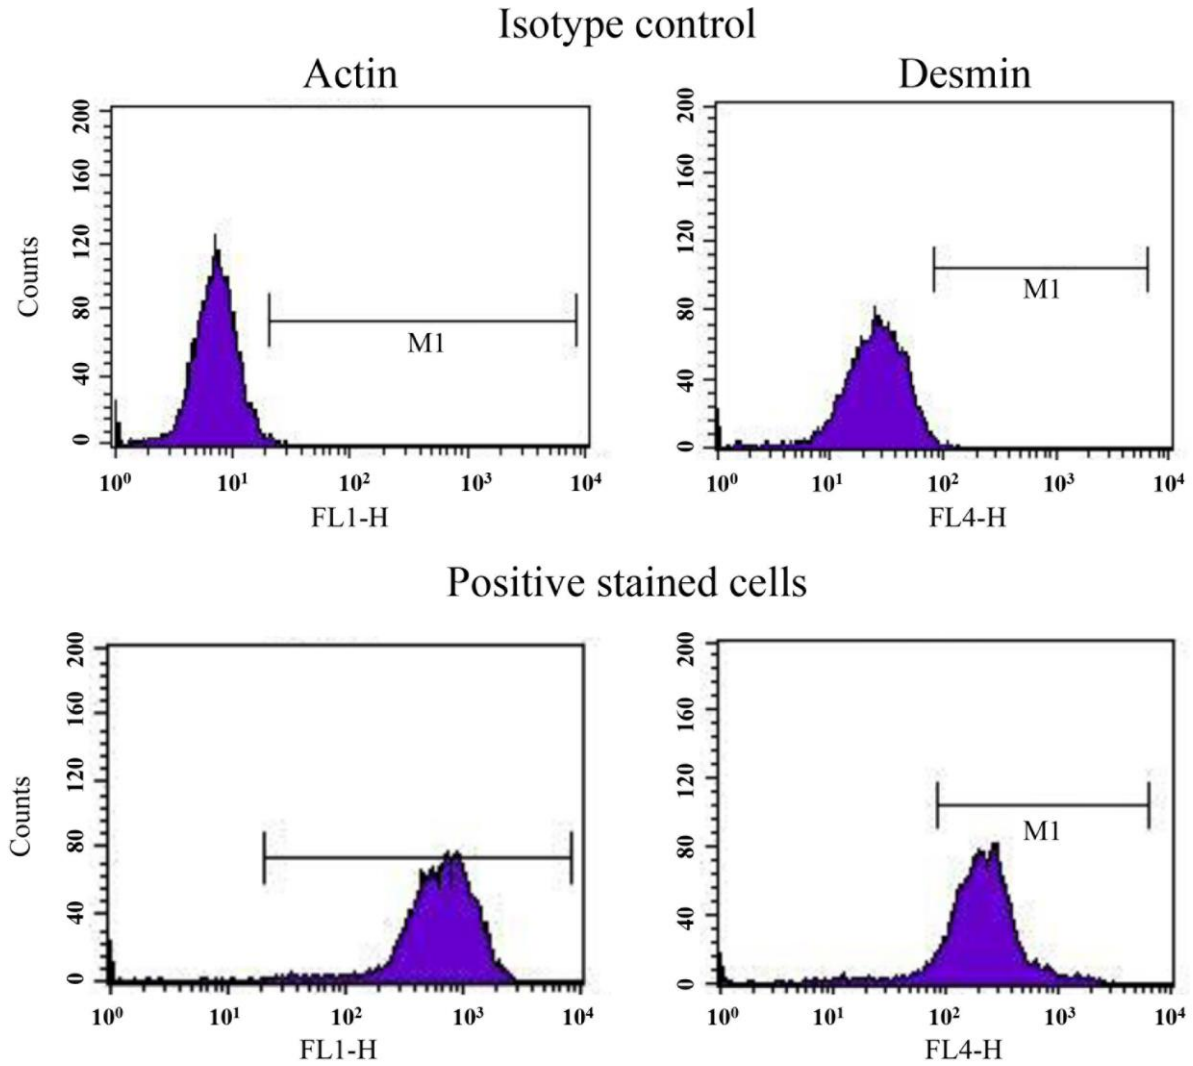

**Supplementary Figure S4.** Representative ASM cell flow cytometry analysis histograms for  $\alpha$ -SMA (actin) and desmin. FL1-H = Intensity (height) in the FL1 channel (green fluorescence). FL4-H = Intensity (height) in the FL4 channel (red fluorescence). M1 = Histogram marker 1.

## Supplementary tables

**Supplementary table S1.** Proteins significantly downregulated in EVs produced by LPS-stimulated neutrophils.

| Proteins downregulated by LPS in neutrophil-derived EVs |                                               |                |         |                         |
|---------------------------------------------------------|-----------------------------------------------|----------------|---------|-------------------------|
| Accession No.                                           | Name                                          | Human ortholog | p-value | Percentage of variation |
| F7ALC9                                                  | Annexin A7                                    | P20073         | 0.0074  | 45.3                    |
| F7BAT4                                                  | von Willebrand factor                         | P04275         | 0.0374  | 22.0                    |
| A0A5F5Q281                                              | Collagen type I alpha 1 chain                 | P02452         | 0.0006  | 45.7                    |
| A0A5F5PJM9                                              | Sorcin                                        | P30626         | 0.0384  | 28.4                    |
| F6WGW2                                                  | Penta-EF-hand domain containing 1             | Q9UBV8         | 0.0074  | 40.3                    |
| F7DE06                                                  | Annexin                                       | P50995         | 0.0063  | 51.1                    |
| A0A5F5PV90                                              | Small nuclear ribonucleoprotein Sm D3         | P62318         | 0.033   | 19.1                    |
| A0A5F5PKJ8                                              | Signal transducing adaptor molecule           | Q92783         | 0.0138  | 25.9                    |
| A0A5F5PN66                                              | RNA-binding protein with serine-rich domain 1 | Q15287         | 0.0198  | 46.0                    |
| A0A3Q2HK18                                              | L-selectin                                    | P14151         | 0.0304  | 26.5                    |
| A0A3Q2KNS3                                              | Zinc finger DBF-type containing 2             | Q9HCK1         | 0.0015  | 37.1                    |
| F7CBT8                                                  | Glucose transporter type 1, erythrocyte/brain | P11166         | 0.0234  | 7.5                     |
| A0A3Q2H0K6                                              | ABC-type glutathione-S-conjugate transporter  | P33527         | 0.0017  | 44.4                    |
| F7B6G4                                                  | Integrin subunit alpha 6                      | P23229         | 0.0123  | 13.2                    |
| A0A5F5PR12                                              | Vanin 1                                       | O95497         | <0.0001 | 38.6                    |
| A0A3Q2KM06                                              | Collagen type VI alpha 1 chain                | P12109         | 0.0083  | 11.3                    |
| F7APH4                                                  | Osteonectin                                   | P09486         | 0.0015  | 32.2                    |
| F7CYR1                                                  | Antithrombin-III                              | P01008         | 0.0009  | 30.7                    |
| Q28369                                                  | Retinol-binding protein 4                     | P02753         | 0.043   | 11.6                    |
| F6Y5W8                                                  | Rho guanine nucleotide exchange factor 5      | Q12774         | 0.007   | 20.8                    |
| A0A3Q2HL62                                              | Glycoprotein Ib platelet subunit beta         | P13224         | 0.0167  | 17.2                    |
| F7CN11                                                  | Fibronectin                                   | P02751         | 0.0262  | 19.8                    |
| A0A3Q2H143                                              | Thromboxane A synthase 1                      | P24557         | 0.0084  | 21.1                    |
| F6YUE1                                                  | SPARC like 1                                  | Q14515         | 0.0459  | 36.9                    |
| A0A3Q2GXP0                                              | Grancalcin                                    | P28676         | 0.0266  | 36.5                    |
| A0A3Q2HNV2                                              | Insulin-like growth factor-binding protein 2  | P18065         | 0.0134  | 11.4                    |
| F6RTI8                                                  | Collagen type I alpha 2 chain                 | P08123         | 0.0057  | 36.8                    |
| F6TQF7                                                  | Integrin subunit alpha 2b                     | P08514         | 0.0062  | 18.9                    |
| F6RBT1                                                  | Eosinophil peroxidase                         | P11678         | 0.0247  | 20.4                    |
| A0A5F5PJQ9                                              | Fibrinogen beta chain                         | P02675         | 0.031   | 25.3                    |
| A0A3Q2HJP2                                              | Integrin beta                                 | P05106         | 0.0085  | 23.4                    |
| P02062                                                  | Hemoglobin subunit beta                       | P68871         | 0.0493  | 10.5                    |
| F6W2Y1                                                  | Fibrinogen gamma chain                        | P02679         | 0.0193  | 27.5                    |

|                   |                         |        |        |      |
|-------------------|-------------------------|--------|--------|------|
| <b>A0A3Q2HTG2</b> | Fibrinogen alpha chain  | P02671 | 0.0247 | 20.0 |
| <b>F6XVR0</b>     | Sulfotransferase        | P50225 | 0.0375 | 33.9 |
| <b>H9GZN9</b>     | Uncharacterized protein | P01871 | 0.0321 | 12.4 |

**Supplementary table S2.** Proteins significantly upregulated in EVs produced by LPS-stimulated neutrophils.

| Proteins upregulated by LPS in neutrophil-derived EVs |                                                                |                |         |                         |
|-------------------------------------------------------|----------------------------------------------------------------|----------------|---------|-------------------------|
| Accession No.                                         | Name                                                           | Human ortholog | p-value | Percentage of variation |
| A0A3Q2KJ87                                            | Bactericidal permeability-increasing protein                   | P17213         | 0.0009  | 68.4                    |
| F7B3H1                                                | Procollagen-lysine 5-dioxygenase                               | O60568         | 0.0032  | 60.3                    |
| F6VS59                                                | Parvin gamma                                                   | Q9HBI0         | 0.0225  | 29.8                    |
| F7DPD7                                                | Torsin                                                         | Q8N2E6         | <0.0001 | 71.9                    |
| A0A3Q2L464                                            | Multiple inositol-polyphosphate phosphatase 1                  | Q9UNW1         | 0.0025  | 43.5                    |
| F6V0F7                                                | Hexosyltransferase                                             | Q8N6G5         | 0.001   | 53.4                    |
| F6VBP9                                                | Apolipoprotein E                                               | P02649         | 0.0322  | 29.4                    |
| A0A3Q2I4A5                                            | Elastase, neutrophil expressed                                 | P08246         | 0.0018  | 65.4                    |
| F7AED2                                                | Alpha-1-acid glycoprotein 2                                    | P19652         | 0.0431  | 22.2                    |
| F7CQ86                                                | Alpha-1-acid glycoprotein 2                                    | P19652         | 0.0072  | 39.3                    |
| A0A3Q2HNI5                                            | Glucosidase II alpha subunit                                   | Q14697         | 0.0005  | 76.0                    |
| A0A3Q2HWQ6                                            | Complement C3                                                  | P01024         | 0.0007  | 64.4                    |
| F7CE24                                                | Tetraspanin                                                    | Q8NG11         | 0.0002  | 72.7                    |
| F6TIR2                                                | Lipocalin 2                                                    | P80188         | 0.0026  | 51.4                    |
| A0A5F5PES5                                            | Rho guanine nucleotide exchange factor 1                       | Q92888         | 0.0018  | 40.0                    |
| F7BAR6                                                | Transmembrane 9 superfamily member                             | Q9HD45         | 0.0102  | 31.6                    |
| F6W1S0                                                | Resistin                                                       | Q9HD89         | 0.0003  | 46.7                    |
| F6PYT5                                                | Transmembrane channel-like protein                             | Q8IU68         | 0.0007  | 45.3                    |
| A0A3Q2GT20                                            | Versican                                                       | P13611         | 0.0069  | 46.6                    |
| A0A3Q2LEE0                                            | Protease, serine 57                                            | Q6UWY2         | 0.0013  | 46.8                    |
| F7DPZ6                                                | Olfactomedin 4                                                 | Q6UX06         | 0.0005  | 39.4                    |
| F7C5U7                                                | DENN domain containing 3                                       | A2RUS2         | 0.0087  | 36.8                    |
| A0A3Q2I8H8                                            | Galectin-3-binding protein                                     | Q08380         | 0.0368  | 42.5                    |
| F6VFN4                                                | Sushi domain containing 3                                      | Q96L08         | 0.0002  | 62.3                    |
| A0A3Q2LDY0                                            | Syntaxin 2                                                     | P32856         | 0.0038  | 41.6                    |
| F7E191                                                | Phospholipid-transporting ATPase                               | Q8TF62         | 0.0079  | 29.7                    |
| F6XKR9                                                | Late endosomal/lysosomal adaptor and MAPK and MTOR activator 1 | Q6IAA8         | 0.0088  | 43.0                    |
| F6Y9M7                                                | C-X-C chemokine receptor type 4                                | P61073         | 0.0011  | 41.9                    |
| F6TZ61                                                | Aldehyde dehydrogenase                                         | P43353         | 0.0083  | 46.8                    |
| F7CUM5                                                | Calcium and integrin binding 1                                 | Q99828         | 0.002   | 38.9                    |
| A0A3Q2HS16                                            | ADAM metallopeptidase domain 8                                 | P78325         | 0.0026  | 35.3                    |
| A0A3Q2HJN8                                            | Interleukin-1                                                  | P18510         | 0.0025  | 66.6                    |
| F6T7K7                                                | Transcobalamin 1                                               | P20061         | 0.0016  | 50.5                    |
| F7E4J9                                                | Synaptotagmin like 1                                           | Q8IYJ3         | 0.004   | 44.4                    |
| F7D6J0                                                | Myeloid associated differentiation marker                      | Q96S97         | 0.006   | 35.6                    |

|                   |                                                                |        |         |      |
|-------------------|----------------------------------------------------------------|--------|---------|------|
| <b>F6Y4R0</b>     | Thioredoxin related transmembrane protein 1                    | Q9H3N1 | 0.0081  | 29.6 |
| <b>A0A3Q2HBT4</b> | HORSE Polypeptide N-acetylgalactosaminyltransferase            | Q10471 | 0.0093  | 55.3 |
| <b>F7C456</b>     | CD177 antigen                                                  | Q8N6Q3 | 0.0004  | 55.9 |
| <b>A0A3Q2H4P6</b> | Carcinoembryonic antigen-related cell adhesion molecule 1      | P13688 | 0.0006  | 32.5 |
| <b>A0A3Q2I5A5</b> | Beta-1,4-galactosyltransferase 1                               | P15291 | 0.0048  | 52.2 |
| <b>F7ADT4</b>     | N-formyl peptide receptor 2                                    | P25090 | 0.0014  | 42.1 |
| <b>F6YZ58</b>     | Solute carrier organic anion transporter family member         | Q6ZQN7 | 0.0216  | 33.2 |
| <b>F6WUK1</b>     | ArfGAP with RhoGAP domain, ankyrin repeat and PH domain 1      | Q96P48 | 0.0369  | 24.5 |
| <b>F6USJ2</b>     | Phospholipid-transporting ATPase                               | Q9Y2Q0 | 0.0124  | 37.4 |
| <b>Q9MYW3</b>     | Toll-like receptor 4                                           | O00206 | 0.0004  | 42.1 |
| <b>F7DTB6</b>     | Karyopherin subunit beta 1                                     | Q14974 | 0.0008  | 59.6 |
| <b>F7AGL5</b>     | 92 kDa gelatinase (MMP9)                                       | P14780 | 0.0067  | 53.7 |
| <b>F6UG91</b>     | Golgin A7                                                      | Q7Z5G4 | 0.0027  | 48.4 |
| <b>A0A5F5PKL6</b> | Cathepsin G                                                    | P08311 | 0.0009  | 75.5 |
| <b>H9GZT7</b>     | Extended synaptotagmin 2                                       | A0FGR8 | 0.0459  | 15.5 |
| <b>F6SCH8</b>     | Target of myb1 membrane trafficking protein                    | O60784 | 0.0008  | 45.2 |
| <b>A0A3Q2GTF2</b> | Carcinoembryonic antigen-related cell adhesion molecule 1      | P13688 | <0.0001 | 51.2 |
| <b>F6T1X0</b>     | Carcinoembryonic antigen-related cell adhesion molecule 1      | P13688 | 0.0009  | 45.2 |
| <b>F6XN76</b>     | E3 ubiquitin-protein ligase                                    | Q96J02 | 0.002   | 49.5 |
| <b>F6R7B4</b>     | Matrix metalloproteinase 1 (MMP1)                              | P03956 | 0.0461  | 31.7 |
| <b>A0A3Q2GS71</b> | Alpha-1-acid glycoprotein 2                                    | P19652 | 0.0266  | 24.9 |
| <b>A0A5F5Q329</b> | Ribosomal protein S6 kinase                                    | Q15349 | 0.0051  | 21.5 |
| <b>F6QGF7</b>     | DnaJ heat shock protein family (Hsp40) member                  | Q9H3Z4 | 0.0001  | 44.5 |
| <b>F7BKI9</b>     | Toll interacting protein                                       | Q9H0E2 | 0.0032  | 55.2 |
| <b>O77811</b>     | Lactotransferrin (Fragment)                                    | P02788 | 0.0003  | 56.1 |
| <b>A0A3Q2GSF8</b> | Nucleosome assembly protein 1 like 1                           | P55209 | 0.0335  | 5.7  |
| <b>A0A5F5PT74</b> | Paxillin                                                       | P49023 | 0.0126  | 30.8 |
| <b>A0A5F5PJ10</b> | Drebrin like                                                   | Q9UJU6 | 0.0130  | 32.1 |
| <b>A0A3Q2HVS2</b> | RAB11 family interacting protein 1                             | Q6WKZ4 | 0.028   | 17.0 |
| <b>F7B4U0</b>     | Disco interacting protein 2 homolog B                          | Q9P265 | 0.0005  | 39.9 |
| <b>F6U6V3</b>     | Disintegrin and metalloproteinase domain-containing protein 10 | O14672 | 0.0004  | 59.6 |
| <b>F6XWM5</b>     | Haptoglobin                                                    | P00738 | 0.0017  | 34.2 |
| <b>A0A3Q2H2V4</b> | HECT-type E3 ubiquitin transferase                             | P46934 | 0.0063  | 21.4 |
| <b>F7BTZ8</b>     | Atlastin GTPase 3                                              | Q6DD88 | 0.0302  | 25.8 |
| <b>F6YTR6</b>     | Rhomboid 5 homolog 2                                           | Q6PJF5 | 0.0038  | 41.4 |
| <b>F6U8J5</b>     | Sialic acid-binding Ig-like lectin 5                           | O15389 | 0.0045  | 52.6 |

|                   |                                                              |        |         |       |
|-------------------|--------------------------------------------------------------|--------|---------|-------|
| <b>A0A3Q2GWA2</b> | Thioredoxin interacting protein                              | Q9H3M7 | 0.0102  | 35.3  |
| <b>F7D1W9</b>     | Ficolin-1                                                    | O00602 | 0.0148  | 47.5  |
| <b>F6RIG2</b>     | ADP ribosylation factor like GTPase 8B                       | Q9NVJ2 | 0.0262  | 26.0  |
| <b>A0A3Q2HG96</b> | ADAM metallopeptidase domain 17                              | P78536 | 0.0029  | 40.1  |
| <b>A0A3Q2HGY5</b> | Tyrosine-protein kinase                                      | P41240 | 0.0137  | 26.1  |
| <b>A0A3Q2GTT1</b> | Ribosomal protein S6 kinase                                  | Q15418 | 0.0398  | 13.0  |
| <b>F7B7Q0</b>     | Dedicator of cytokinesis 2                                   | Q92608 | 0.01    | 20.9  |
| <b>A0A3Q2I8S7</b> | Interferon-induced protein with tetratricopeptide repeats 1B | Q5T764 | 0.0059  | 44.4  |
| <b>F6YTU4</b>     | Docking protein 3                                            | Q7L591 | 0.0111  | 27.4  |
| <b>F7CGD4</b>     | Non-specific protein-tyrosine kinase                         | Q14289 |         |       |
| <b>A0A3Q2GSP8</b> | Signal regulatory protein alpha                              | P78324 | 0.0011  | 20.18 |
| <b>F7DB64</b>     | Cytochrome b-245 light chain                                 | P13498 | 0.0375  | 16.7  |
| <b>F6U8Z5</b>     | Calcium binding protein 39                                   | Q9Y376 | 0.0015  | 35.8  |
| <b>A0A3Q2HZX9</b> | Azurocidin 1                                                 | P20160 | 0.0028  | 41.2  |
| <b>A0A3Q2I177</b> | Pleckstrin homology domain containing O2                     | Q8TD55 | 0.0008  | 30.3  |
| <b>A0A3Q2HVB6</b> | Complement component 4 binding protein alph                  | P04003 | 0.0106  | 49.6  |
| <b>F6ZNQ1</b>     | Regulator of G protein signaling 14                          | O43566 | 0.0013  | 19.9  |
| <b>F6QXT2</b>     | VAMP associated protein A                                    | Q9P0L0 | 0.0118  | 13.7  |
| <b>F7B7M3</b>     | Inositol 1,4,5-trisphosphate receptor-interacting protein    | Q8IWB1 | 0.0137  | 28.5  |
| <b>A0A3Q2LPJ8</b> | Adhesion G protein-coupled receptor E1                       | Q14246 | 0.0004  | 49.8  |
| <b>A0A3Q2I7B5</b> | Mitogen-activated protein kinase kinase kinase 4             | O95819 | 0.0035  | 40.9  |
| <b>F6U8F1</b>     | Formin like 1                                                | O95466 | <0.0001 | 45.8  |
| <b>F6RBQ4</b>     | Ectonucleoside triphosphate diphosphohydrolase 3             | O75355 | 0.0002  | 26.4  |
| <b>F6WSK2</b>     | Sialic acid-binding Ig-like lectin 5                         | O15389 | <0.0001 | 45.3  |
| <b>F7AT17</b>     | Tyrosine-protein kinase                                      | P08631 | 0.0002  | 47.8  |
| <b>A0A5F5PWD5</b> | Serine/threonine kinase 26                                   | Q9P289 | 0.0191  | 12.7  |
| <b>A0A3Q2I8D8</b> | Glia-derived nexin                                           | P07093 | 0.0053  | 53.3  |
| <b>A0A5F5PG05</b> | Integrin beta                                                | P05107 | <0.0001 | 44.2  |
| <b>F6WQL1</b>     | Ecotropic viral integration site 2B                          | P34910 | 0.0232  | 12.7  |
| <b>F7A0H6</b>     | Folate receptor beta                                         | P14207 | 0.0002  | 46.1  |
| <b>F7AA00</b>     | GRB2 binding adaptor protein, transmembrane                  | Q8N292 | 0.0002  | 29.5  |
| <b>F7DA90</b>     | Cytochrome b-245 beta chain                                  | P04839 | <0.0001 | 47.9  |
| <b>F7AZ73</b>     | Syntaxin binding protein 2                                   | Q15833 | 0.0077  | 26.5  |
| <b>F6QC17</b>     | V-set immunoregulatory receptor                              | Q9H7M9 | 0.0063  | 21.5  |
| <b>A0A5F5PLR4</b> | 2,3-cyclic-nucleotide 3-phosphodiesterase                    | P09543 | 0.004   | 30.8  |
| <b>F6TLH4</b>     | Secretory carrier-associated membrane protein                | O15127 | 0.0049  | 34.7  |

|                   |                                                          |        |         |      |
|-------------------|----------------------------------------------------------|--------|---------|------|
| <b>A0A5F5PF14</b> | Brain abundant membrane attached signal protein 1        | P80723 | 0.0001  | 21.3 |
| <b>F6PUW3</b>     | Maltase-glucoamylase                                     | O43451 | <0.0001 | 27.0 |
| <b>A0A3Q2HN26</b> | Pleckstrin                                               | P08567 | 0.0004  | 38.7 |
| <b>F7CK20</b>     | Tyrosine-protein kinase                                  | P09769 | 0.0006  | 46.4 |
| <b>F7BQS3</b>     | Growth factor receptor bound protein 2                   | P62993 | 0.0042  | 33.8 |
| <b>A0A3Q2IBB5</b> | Golgi apparatus protein 1                                | Q92896 | 0.0128  | 35.0 |
| <b>F7BBA7</b>     | Solute carrier family 44 member 2                        | Q8IWA5 | 0.0004  | 39.4 |
| <b>F6RA08</b>     | Stomatin                                                 | P27105 | 0.0297  | 22.4 |
| <b>F6XAB0</b>     | Synaptosomal-associated protein                          | O00161 | 0.0014  | 33.5 |
| <b>F7ASL2</b>     | DNAX-activation protein 12                               | O43914 | 0.0003  | 23.8 |
| <b>F6QRY3</b>     | Peptide-methionine (S)-S-oxide reductase                 | Q9UJ68 | 0.0047  | 37.6 |
| <b>F6PM31</b>     | Leukocyte specific transcript 1                          | O00453 | 0.0008  | 20.7 |
| <b>A0A3Q2L513</b> | Sialic acid-binding Ig-like lectin 14                    | Q08ET2 | 0.0005  | 36.8 |
| <b>F6WA92</b>     | RAB5B, member RAS oncogene family                        | P61020 | 0.0019  | 30.4 |
| <b>F7AQZ6</b>     | Tyrosine-protein kinase                                  | P07948 | 0.0004  | 47.0 |
| <b>F6Z904</b>     | RAB5A, member RAS oncogene family                        | P20339 | 0.0005  | 26.7 |
| <b>A0A5F5PWB4</b> | Tyrosine-protein phosphatase non-receptor type           | P29350 | <0.0001 | 48.2 |
| <b>F6RL28</b>     | Protein XRP2                                             | O75695 | 0.0003  | 42.9 |
| <b>F6YW90</b>     | Urokinase plasminogen activator surface receptor         | Q03405 | 0.0043  | 29.0 |
| <b>A0A5F5Q058</b> | Pleckstrin homology domain containing B2                 | Q96CS7 | 0.014   | 33.7 |
| <b>F6Y9X0</b>     | Hydrogen voltage-gated channel 1                         | Q96D96 | 0.0004  | 43.7 |
| <b>A0A3Q2HX75</b> | Semaphorin 7A                                            | O75326 | 0.0153  | 29.6 |
| <b>F6PNU9</b>     | ADP-ribosylation factor 6                                | P62330 | <0.0001 | 38.4 |
| <b>A0A5F5PRD3</b> | Non-specific serine/threonine protein kinase             | O94804 | 0.0032  | 17.7 |
| <b>A0A3Q2GZC0</b> | Cysteine rich secretory protein LCCL domain containing 2 | Q9H0B8 | 0.0021  | 49.2 |
| <b>F6QK77</b>     | Deoxyribonuclease                                        | P49184 | <0.0001 | 36.1 |
| <b>A0A3Q2LJE9</b> | Nicastrin                                                | Q92542 | 0.0124  | 17.1 |
| <b>A0A3Q2GYF6</b> | Protein-tyrosine-phosphatase                             | P08575 | <0.0001 | 32.4 |
| <b>F6S0P5</b>     | ADP ribosylation factor 4                                | P18085 | 0.0368  | 29.5 |
| <b>F7DGE2</b>     | Vesicle-fusing ATPase                                    | P46459 | 0.0208  | 22.3 |
| <b>F6QUD4</b>     | Wiskott-Aldrich syndrome protein family member           | Q9Y6W5 | 0.0021  | 29.2 |
| <b>A0A3Q2HC74</b> | Plexin C1                                                | O60486 | 0.0002  | 28.4 |
| <b>F7CEP4</b>     | G protein-coupled receptor kinase                        | P43250 | 0.0027  | 23.6 |
| <b>F6PM70</b>     | Arachidonate 5-lipoxygenase                              | P09917 | 0.0061  | 28.1 |
| <b>F6U4Y1</b>     | TNF alpha induced protein 8                              | O95379 | 0.0035  | 16.6 |
| <b>A0A3Q2IDH0</b> | CMRF35-like molecule 1                                   | Q8TDQ1 | 0.0488  | 23.2 |
| <b>F6SP02</b>     | 14-3-3 protein theta                                     | P27348 | 0.0203  | 37.6 |
| <b>F6X8Y3</b>     | GNAS complex locus                                       | P63092 | 0.0015  | 32.0 |

|                   |                                                           |        |        |      |
|-------------------|-----------------------------------------------------------|--------|--------|------|
| <b>F6VWQ7</b>     | Thymocyte selection associated family member 2            | Q5TEJ8 | 0.0121 | 27.1 |
| <b>F6YR57</b>     | Vesicle associated membrane protein 8                     | Q9BV40 | 0.0163 | 33.9 |
| <b>F6R869</b>     | Pre-mRNA processing factor 38B                            | Q5VTL8 | 0.0014 | 22.5 |
| <b>A0A3Q2I008</b> | Ras-related protein Rap-2                                 | P61225 | 0.0008 | 49.6 |
| <b>A0A5F5PWD2</b> | RAB18, member RAS oncogene family                         | Q9NP72 | 0.0179 | 25.2 |
| <b>F6YSK7</b>     | Myristoylated alanine rich protein kinase C substrate     | P29966 | 0.0116 | 20.5 |
| <b>A0A3Q2HV04</b> | Reticulon                                                 | Q9NQC3 | 0.0146 | 30.7 |
| <b>F6VYP4</b>     | Abl interactor 1                                          | Q8IZP0 | 0.0012 | 19.3 |
| <b>F7B9Q9</b>     | Protein kinase C and casein kinase substrate in neurons 2 | Q9UNF0 | 0.0037 | 19.8 |
| <b>A0A3Q2GTT9</b> | Macrophage-capping protein                                | P40121 | 0.0003 | 18.9 |
| <b>F6TGW2</b>     | Histidine ammonia-lyase                                   | P42357 | 0.0489 | 22.7 |
| <b>A0A3Q2HM94</b> | Solute carrier family 2 member 3                          | P11169 | 0.0001 | 37.1 |
| <b>F6PSF7</b>     | Triggering receptor expressed on myeloid cells 1          | Q9NP99 | 0.0003 | 39.0 |
| <b>F6QB61</b>     | Peptidoglycan-recognition protein                         | O75594 | 0.0041 | 32.9 |
| <b>F7B1Q3</b>     | N-formyl peptide receptor 2-like                          | P25090 | 0.0004 | 44.2 |



**Supplementary table S3.** Proteins significantly upregulated in EVs produced by LPS-stimulated neutrophils, only during asthmatic exacerbation.

| <b>Proteins upregulated by LPS only or more during the exacerbation phase of the disease in neutrophil-derived EVs</b> |                                                       |                       |                 |                                 |
|------------------------------------------------------------------------------------------------------------------------|-------------------------------------------------------|-----------------------|-----------------|---------------------------------|
| <b>Accession No.</b>                                                                                                   | <b>Name</b>                                           | <b>Human ortholog</b> | <b>p-value*</b> | <b>Percentage of variation*</b> |
| <b>F6WZ50</b>                                                                                                          | Splicing factor 3b subunit 1                          | O75533                | 0.0034          | 4.3                             |
| <b>F7E0S8</b>                                                                                                          | Regulator of G protein signaling 19                   | P49795                | 0.0151          | 13.0                            |
| <b>F6T0R5</b>                                                                                                          | V-type proton ATPase subunit a                        | Q13488                | 0.0179          | 3.8                             |
| <b>A0A3Q2I8C1</b>                                                                                                      | Phosphoglucomutase 2                                  | Q96G03                | 0.0075          | 16.5                            |
| <b>A0A3Q2HG96</b>                                                                                                      | ADAM metallopeptidase domain 17                       | P78536                | 0.0135          | 5.5                             |
| <b>F6WQL1</b>                                                                                                          | Ecotropic viral integration site 2B                   | P34910                | 0.0067          | 9.2                             |
| <b>F6YTU4</b>                                                                                                          | Docking protein 3                                     | Q7L591                | 0.042           | 14.1                            |
| <b>A0A3Q2I427</b>                                                                                                      | Leucine rich alpha-2-glycoprotein 1                   | P02750                | 0.0286          | 15.7                            |
| <b>F7CUM5</b>                                                                                                          | Calcium and integrin binding 1                        | Q99828                | 0.0259          | 1.1                             |
| <b>F6U8J5</b>                                                                                                          | Sialic acid-binding Ig-like lectin 5                  | O15389                | 0.0176          | 6.8                             |
| <b>F7B7Q0</b>                                                                                                          | Dedicator of cytokinesis 2                            | Q92608                | 0.0422          | 3.4                             |
| <b>A0A3Q2I7B5</b>                                                                                                      | Mitogen-activated protein kinase kinase kinase 4      | O95819                | 0.003           | 9.7                             |
| <b>F6U8F1</b>                                                                                                          | Formin like 1                                         | O95466                | 0.0269          | 4.4                             |
| <b>F7BQS3</b>                                                                                                          | Growth factor receptor bound protein 2                | P62993                | 0.0455          | 5.1                             |
| <b>F6QRY3</b>                                                                                                          | Peptide-methionine (S)-S-oxide reductase              | Q9UJ68                | 0.0491          | 4.8                             |
| <b>F6WA92</b>                                                                                                          | RAB5B, member RAS oncogene family                     | P61020                | 0.0364          | 3.3                             |
| <b>F7AQZ6</b>                                                                                                          | Tyrosine-protein kinase                               | P07948                | 0.0334          | 1.7                             |
| <b>F6RL28</b>                                                                                                          | Protein XRP2                                          | O75695                | 0.0317          | 1.9                             |
| <b>A0A3Q2LJE9</b>                                                                                                      | Nicastrin                                             | Q92542                | 0.0115          | 2.9                             |
| <b>A0A3Q2HC74</b>                                                                                                      | Plexin C1                                             | O60486                | 0.0469          | 2.7                             |
| <b>F7CEP4</b>                                                                                                          | G protein-coupled receptor kinase                     | P43250                | 0.0143          | 0.81                            |
| <b>A0A3Q2I008</b>                                                                                                      | Ras-related protein Rap-2                             | P61225                | 0.0244          | 3.5                             |
| <b>A0A3Q2GTT9</b>                                                                                                      | Macrophage-capping protein                            | P40121                | 0.0038          | 20.9                            |
| <b>F6YSK7</b>                                                                                                          | Myristoylated alanine rich protein kinase C substrate | P29966                | 0.0189          | 5.5                             |
| <b>* p-value and % of variation of the factor interaction of the disease status and cell treatment</b>                 |                                                       |                       |                 |                                 |

**Supplementary table S4.** Biological processes enriched in proteins from neutrophil-derived EVs stimulated with LPS.

| Biological processes enriched in proteins from neutrophil-derived EVs stimulated with LPS |                                            |                                                                                                                                                                                                                  |
|-------------------------------------------------------------------------------------------|--------------------------------------------|------------------------------------------------------------------------------------------------------------------------------------------------------------------------------------------------------------------|
| Downregulation by LPS                                                                     |                                            |                                                                                                                                                                                                                  |
| Biological process                                                                        | Description                                | Proteins involved (symbol)                                                                                                                                                                                       |
| GO:0062023                                                                                | Collagen-containing extracellular matrix   | ANXA7, ANXA11, SERPINC1, COL1A1, COL1A2, COL6A1, FGA, FGB, FGG, FN1, SPARC, VWF, SPARCL1                                                                                                                         |
| GO:0031091                                                                                | Platelet alpha granule                     | FGA, FGB, FGG, FN1, ITGA2B, ITGB3, SPARC, VWF, GP1BB, HBB, SERPINC1, COL1A1, SLC2A1, ITGA6, SELL, SPARCL1, VNN1, EPX, GCA, ANXA7, TBXAS1, RBP4, SRI, COL1A2, ABCC1, ANXA11, IGFBP2, PEF1, STAM, ARHGEF5, SULT1A1 |
| GO:0002020                                                                                | Protease binding                           | SERPINC1, COL1A1, COL1A2, FN1, ITGB3, SELL, SRI, VWF, SULT1A1                                                                                                                                                    |
| GO:0019838                                                                                | Growth factor binding                      | COL1A1, COL1A2, COL6A1, IGFBP2, ITGA6, ITGB3, ANXA7, FN1, ITGA2B, VWF, SPARC, SPARCL1, GP1BB, RBP4                                                                                                               |
| GO:0030667                                                                                | Secretory granule membrane                 | ANXA7, ITGA2B, ITGB3, SELL, SPARC, SRI, VNN1                                                                                                                                                                     |
| GO:0043589                                                                                | Skin morphogenesis                         | COL1A1, COL1A2, ITGA6, COL6A1, GP1BB, RBP4, ABCC1                                                                                                                                                                |
| GO:0005509                                                                                | Calcium ion binding                        | ANXA7, ANXA11, SELL, SPARC, SRI, SPARCL1, GCA, PEF1                                                                                                                                                              |
| GO:0090482                                                                                | Vitamin transmembrane transporter activity | ABCC1, RBP4, SLC2A1, VNN1, FN1, IGFBP2                                                                                                                                                                           |
| GO:0006979                                                                                | Response to oxidative stress               | COL1A1, HBB, ABCC1, EPX, VNN1, TBXAS1                                                                                                                                                                            |
| GO:0050900                                                                                | Leukocyte migration                        | ITGA6, SELL, ARHGEF5, EPX                                                                                                                                                                                        |
| GO:0032526                                                                                | Response to retinoic acid                  | COL1A1, IGFBP2, RBP4, ABCC1, SULT1A1, SLC2A1                                                                                                                                                                     |
| GO:0042470                                                                                | Melanosome                                 | ANXA11, ITGB3, SLC2A1                                                                                                                                                                                            |
| GO:0008289                                                                                | Lipid binding                              | ANXA7, ANXA11, RBP4, SELL, ARHGEF5, STAM                                                                                                                                                                         |
| GO:0042383                                                                                | Sarcolemma                                 | COL6A1, SLC2A1, SRI                                                                                                                                                                                              |
| GO:0005766                                                                                | Primary lysosome                           | ANXA11, VNN1, GCA                                                                                                                                                                                                |
| GO:0050865                                                                                | Regulation of cell activation              | FGG, FN1, GP1BB, IGFBP2, VNN1                                                                                                                                                                                    |
| GO:0030139                                                                                | Endocytic vesicle                          | ANXA11, HBB, SPARC                                                                                                                                                                                               |
| Upregulation by LPS                                                                       |                                            |                                                                                                                                                                                                                  |
| GO:0042581                                                                                | Specific granule                           | ADAM8, ADAM10, ALDH3B1, CEACAM1, BPI, CYBA, CYBB, DNASE1L1, DOCK2, ELANE, STOM, FPR2, HP, ITGB2, KPNB1, LCN2, LTF, ORM2, PLAUR, PTPN6, RAP2B, SLC2A3, STK10, STXBP2,                                             |

|                   |                                          |                                                                                                                                                                                                                                                                                                                                                            |
|-------------------|------------------------------------------|------------------------------------------------------------------------------------------------------------------------------------------------------------------------------------------------------------------------------------------------------------------------------------------------------------------------------------------------------------|
|                   |                                          | TCN1, VAMP8, SNAP23, PGLYRP1, TOM1, ATP8A1, OLFM4, TOLLIP, LAMTOR1, RETN, CD177, SLC44A2, ATP8B4, DNAJC5, TSPAN14, HVCN1, SLCO4C1, AZU1, B4GALT1, PTPRC, RAB5B, TYROBP, SIGLEC5, MGAM, VAPA, RAB18, NCSTN, DOK3, SIRPA, SIGLEC14, MMP9, DBNL, GOLGA7                                                                                                       |
| <b>GO:0005766</b> | Primary lysosome                         | AZU1, BPI, C3, CTSG, ELANE, STOM, B4GALT1, ORM2, STXBP2, VAMP8, SNAP23, VAPA, TOM1, ATP8A1, NCSTN, TOLLIP, LAMTOR1, RETN, DNAJC5, SLCO4C1, PRSS57, ADAM8, VCAN, HCK, LYN, NSF, CXCR4, ARL8B, SLC44A2                                                                                                                                                       |
| <b>GO:0034774</b> | Secretory granule lumen                  | ALOX5, AZU1, BPI, C3, CTSG, DNASE1L1, DOCK2, ELANE, FCN1, FGR, HP, KPNB1, LCN2, LGALS3BP, LTF, ORM2, PTPN6, TCN1, PGLYRP1, OLFM4, DBNL, CAB39, TOLLIP, RETN, CRISPLD2, PRSS57, VCAN                                                                                                                                                                        |
| <b>GO:0101002</b> | Ficolin-1-rich granule                   | ADAM8, ALOX5, FCN1, FPR2, ITGB2, KPNB1, MMP9, SLC2A3, SIGLEC5, MGAM, DBNL, CAB39, LAMTOR1, DOK3, PLEKHO2, CRISPLD2, SIRPA, SIGLEC14                                                                                                                                                                                                                        |
| <b>GO:0006954</b> | Inflammatory response                    | ADAM8, ALOX5, AZU1, C3, CYBA, CYBB, ELANE, FOLR2, FPR2, B4GALT1, HCK, HP, IL1RN, ITGB2, LYN, ORM2, TLR4, TYROBP, CXCR4, SEMA7A, SNAP23, THEMIS2, TREM1, TOLLIP, ITCH                                                                                                                                                                                       |
| <b>GO:0060627</b> | Regulation of vesicle-mediated transport | APOE, ARF6, AZU1, CEACAM1, C3, CSK, CYBA, DOCK2, FCN1, FGR, FPR2, HCK, ITGB2, LYN, NSF, PTPRC, RAB5A, RAB5B, STXBP2, VAMP8, PACSIN2, CD177, DNAJC5, SIRPA, CD300LF, ADAM8, ALOX5, ELANE, MMP9, PTPN6, TLR4, TYROBP, SEMA7A, PGLYRP1, RHBDF2, ITCH, IFIT1B, LTF, SERPINE2                                                                                   |
| <b>GO:0050865</b> | Regulation of cell activation            | ADAM8, APOE, CEACAM1, BPI, CSK, CTSG, FGR, ITGB2, LYN, SERPINE2, PLEK, PTPN6, PTPRC, RPS6KA1, STXBP2, TLR4, TYROBP, LST1, VAMP8, PGLYRP1, THEMIS2, CD177, VSIR, ITCH, SIRPA, CD300LF, ADAM10, ALOX5, AZU1, ELANE, PTK2B, IL1RN, PLAUR, CXCR4, MAP4K4, PLXNC1, CIB1, OLFM4, MYADM, C4BPA, HCK, LTF, RHBDF2, C3, FCN1, SEMA7A, EVI2B, B4GALT1, RPS6KA2, ABI1 |
| <b>GO:0002252</b> | Immune effector process                  | AZU1, C3, C4BPA, CTSG, DOCK2, ELANE, PTK2B, FCN1, FGR, HCK, LYN, PTPN6, STXBP2, ADAM17, TLR4, TYROBP, SNAP23, TREM1, ARL8B, GAPT, CSK, ADGRE1, DBNL                                                                                                                                                                                                        |
| <b>GO:0031252</b> | Cell leading edge                        | ARF4, ARF6, CAPG, STX2, PTK2B, FGR, PLEK, PXN, RAB5A, ADAM17, TLR4, CXCR4, ABI1,                                                                                                                                                                                                                                                                           |

|                   |                                                                     |                                                                                                                                                                                                                                              |
|-------------------|---------------------------------------------------------------------|----------------------------------------------------------------------------------------------------------------------------------------------------------------------------------------------------------------------------------------------|
|                   |                                                                     | WASF2, CIB1, PACSIN2, DBNL, CD177, MYADM, CEACAM1, B4GALT1, SYTL1                                                                                                                                                                            |
| <b>GO:0030139</b> | Endocytic vesicle                                                   | ADAM8, APOE, ARF6, FMNL1, CYBA, CYBB, ELANE, HP, LTF, LYN, RAB5A, RAB5B, VAMP8, SNAP23, PGLYRP1, RAB11FIP1, HVCN1                                                                                                                            |
| <b>GO:1904724</b> | Tertiary granule lumen                                              | HP, LTF, MMP9, PTPN6, TCN1, PGLYRP1, OLFM4, DBNL, GOLGA7, APOE                                                                                                                                                                               |
| <b>GO:2000377</b> | Regulation of reactive oxygen species metabolic process             | ALOX5, ARF4, CYBA, PTK2B, FPR2, GRB2, HP, ITGB2, TLR4, TYROBP, CD177, HVCN1, AZU1, FOLR2, LGALS3BP, APOE, KPNB1, CD300LF                                                                                                                     |
| <b>GO:0050900</b> | Leukocyte migration                                                 | ADAM8, ALOX5, AZU1, CTSG, ELANE, B4GALT1, HCK, ITGB2, LYN, MMP9, CXCR4, TREM1, CD177, SIRPA, DOCK2, FPR2, PLAUR, SEMA7A, PLXNC1                                                                                                              |
| <b>GO:1903555</b> | Regulation of tumor necrosis factor superfamily cytokine production | ADAM8, AZU1, BPI, CYBA, CYBB, LTF, ORM2, PTPN6, PTPRC, TLR4, TYROBP, VSIR, SIRPA, C3, ELANE, FCN1, FGR, ADAM17, SEMA7A, CEACAM1                                                                                                              |
| <b>GO:0001775</b> | Cell activation                                                     | ADAM10, AZU1, CTSG, DOCK2, PTK2B, FPR2, GNAS, ITGB2, LYN, PLEK, PTPN6, PTPRC, RAP2B, STXBP2, ADAM17, TLR4, TYROBP, SNAP23, NCSTN, TOLLIP, GAP, HCK                                                                                           |
| <b>GO:0040017</b> | Positive regulation of locomotion                                   | ADAM8, ADAM10, ARF6, AZU1, PTK2B, FGR, FPR2, LYN, MMP9, PTPRC, ADAM17, TLR4, CXCR4, SEMA7A, MAP4K4, ATP8A1, CIB1, RTN4, VSIR, MYADM, APOE, CEACAM1, CSK, ELANE, LTF, PTPN6, RAP2B, ABI1, RGS14, CAB39, GRB2, LAMTOR1, ITCH, SIRPA, C3, PLAUR |
| <b>GO:0001906</b> | Cell killing                                                        | AZU1, C3, CTSG, ELANE, LTF, PTPN6, STXBP2, PGLYRP1, TREM1, ARL8B, LYN, ADAM17, SNAP23, APOE, STOM, CXCR4, VAMP8, VAPA, ITCH, BPI, C4BPA, CNP, FGR, FPR2, HCK, HP, LCN2, TLR4, SIRPA, VCAN, SERPINE2, PTPRC, CRISPLD2, PRSS57, ALOX5, FCN1    |
| <b>GO:0001558</b> | Regulation of cell growth                                           | ADAM10, APOE, CEACAM1, CYBA, PTK2B, SERPINE2, RPS6KA1, ADAM17, CXCR4, SEMA7A, CIB1, DBNL, LAMTOR1, RTN4, DIP2B, ITCH, TMC8, BASP1, ARF4, CYBB, NEDD4, NSF, RAB5A, RGS14, SLC2A3                                                              |
| <b>GO:0005925</b> | Focal adhesion                                                      | ADAM10, ARF6, CYBA, PTK2B, HCK, ITGB2, MARCKS, PLAUR, PTPRC, PXN, ADAM17, SNAP23, MAP4K4, YWHAQ, PACSIN2, NCSTN, PARVG                                                                                                                       |
| <b>GO:0050778</b> | Positive regulation of immune response                              | ADAM8, C3, C4BPA, CSK, CTSG, ELANE, FCN1, FGR, FPR2, HCK, ITGB2, LYN, PTPN6, PTPRC, TLR4, TYROBP, VAMP8, THEMIS2, CD177, APOE, CEACAM1, CYBA, LTF, ITCH, IFIT1B, ADAM10,                                                                     |

|                                                            |                                                        |                                                                     |
|------------------------------------------------------------|--------------------------------------------------------|---------------------------------------------------------------------|
|                                                            |                                                        | AZU1, PTK2B, ADAM17, CXCR4, CD300LF, RAB5A, ARL8B, FOLR2, STK26     |
| <b>Only or more upregulated by LPS during exacerbation</b> |                                                        |                                                                     |
| <b>GO:0030667</b>                                          | Secretory granule membrane                             | RAB5B, RAP2B, SIGLEC5, TCIRG1, NCSTN, DOK3, CAPG, RGS19, RP2        |
| <b>GO:0070820</b>                                          | Tertiary granule                                       | RAP2B, SIGLEC5, TCIRG1, DOK3, LRG1, PGM2                            |
| <b>GO:0007264</b>                                          | Small GTPase mediated signal transduction              | DOCK2, GRB2, RAP2B, RGS19, DOK3                                     |
| <b>GO:0070851</b>                                          | Growth factor receptor binding                         | GRB2, LYN, ADAM17, NCSTN, RAP2B, RGS19, CAPG, DOK3, LRG1            |
| <b>GO:0030097</b>                                          | Hemopoiesis                                            | DOCK2, EVI2B, LYN, ADAM17, TCIRG1, CIB1, RAP2B, NCSTN, FMNL1, RAB5B |
| <b>GO:0030099</b>                                          | Myeloid cell differentiation                           | EVI2B, LYN, TCIRG1, CIB1, ADAM17, MAP4K4, PLXNC1, RAP2B, GRB2       |
| <b>GO:0030036</b>                                          | Actin cytoskeleton organization                        | FMNL1, CAPG, DOCK2, GRB2, MARCKS                                    |
| <b>GO:0042581</b>                                          | Specific granule                                       | DOCK2, RAP2B, LRG1, PGM2                                            |
| <b>GO:0005925</b>                                          | Focal adhesion                                         | MARCKS, ADAM17, MAP4K4, NCSTN                                       |
| <b>GO:0001726</b>                                          | Ruffle                                                 | CAPG, ADAM17, CIB1, MARCKS, MSRA, LYN                               |
| <b>GO:0031267</b>                                          | Small GTPase binding                                   | FMNL1, DOCK2, CIB1, PLXNC1                                          |
| <b>GO:0016773</b>                                          | Phosphotransferase activity, alcohol group as acceptor | GRK6, LYN, MAP4K4, PGM2                                             |
| <b>GO:0030674</b>                                          | Protein-macromolecule adaptor activity                 | GRB2, CIB1, NCSTN, CAPG, MARCKS                                     |
| <b>GO:0006897</b>                                          | Endocytosis                                            | DOCK2, GRB2, RAB5B, LYN                                             |

## References in Supplement

1. Brazil, T.J.; Dagleish, M.P.; McGorum, B.C.; Dixon, P.M.; Haslett, C.; Chilvers, E.R. Kinetics of pulmonary neutrophil recruitment and clearance in a natural and spontaneously resolving model of airway inflammation. *Clin Exp Allergy* **2005**, *35*, 854-865, <https://doi.org/10.1111/j.1365-2222.2005.02231.x>.
2. Dunkel, B.; Rickards, K.J.; Werling, D.; Page, C.P.; Cunningham, F.M. Neutrophil and platelet activation in equine recurrent airway obstruction is associated with increased neutrophil CD13 expression, but not platelet CD41/61 and CD62P or neutrophil-platelet aggregate formation. *Vet Immunol Immunopathol* **2009**, *131*, 25-32, <https://doi.org/10.1016/j.vetimm.2009.03.004>.
3. Koblinger, K.; Hecker, K.; Nicol, J.; Wasko, A.; Fernandez, N.; Leguillette, R. Bronchial collapse during bronchoalveolar lavage in horses is an indicator of lung inflammation. *Equine Vet J* **2014**, *46*, 50-55, <https://doi.org/10.1111/evj.12096>.
4. Douanne, N.; Dong, G.; Amin, A.; Bernardo, L.; Blanchette, M.; Langlais, D.; Olivier, M.; Fernandez-Prada, C. Leishmania parasites exchange drug-resistance genes through extracellular vesicles. *Cell Rep* **2022**, *40*, 111121, <https://doi.org/10.1016/j.celrep.2022.111121>.
5. Zhou, Y.; Zhou, B.; Pache, L.; Chang, M.; Khodabakhshi, A.H.; Tanaseichuk, O.; Benner, C.; Chanda, S.K. Metascape provides a biologist-oriented resource for the analysis of systems-level datasets. *Nat Commun* **2019**, *10*, 1523, <https://doi.org/10.1038/s41467-019-09234-6>.
6. Shannon, P.; Markiel, A.; Ozier, O.; Baliga, N.S.; Wang, J.T.; Ramage, D.; Amin, N.; Schwikowski, B.; Ideker, T. Cytoscape: a software environment for integrated models of biomolecular interaction networks. *Genome Res* **2003**, *13*, 2498-2504, <https://doi.org/10.1101/gr.1239303>.
7. Bindea, G.; Mlecnik, B.; Hackl, H.; Charoentong, P.; Tosolini, M.; Kirilovsky, A.; Fridman, W.H.; Pages, F.; Trajanoski, Z.; Galon, J. ClueGO: a Cytoscape plug-in to decipher functionally grouped gene ontology and pathway annotation networks. *Bioinformatics* **2009**, *25*, 1091-1093, <https://doi.org/10.1093/bioinformatics/btp101>.
8. Bindea, G.; Galon, J.; Mlecnik, B. CluePedia Cytoscape plugin: pathway insights using integrated experimental and in silico data. *Bioinformatics* **2013**, *29*, 661-663, <https://doi.org/10.1093/bioinformatics/btt019>.
9. Vargas, A.; Peltier, A.; Dube, J.; Lefebvre-Lavoie, J.; Moulin, V.; Goulet, F.; Lavoie, J.P. Evaluation of contractile phenotype in airway smooth muscle cells isolated from endobronchial biopsy and tissue specimens from horses. *Am. J. Vet. Res.* **2017**, *78*, 359-370, <https://doi.org/10.2460/ajvr.78.3.359>.
